# Supplementary material
Source: publisher figshare collection journal article supplement (https://asha.figshare.com/articles/dataset/_/5913547)
Supplement: Supplementary file 1 [file 1]

**Supplemental Material S4.** Masker condition signal recognition slopes\* in children (ordering of data is consistent across Supplemental Materials S1 and S2).

| Steady-state<br>noise | Temporally<br>modulated | Spectrally<br>modulated | Two-talker |
|-----------------------|-------------------------|-------------------------|------------|
| 1.70                  | 3.41                    | 2.60                    | 2.36       |
| 1.38                  | 2.33                    | 1.77                    | 3.20       |
| 1.60                  | 2.40                    | 2.10                    | 1.14       |
| 1.76                  | 1.84                    | 1.76                    | 1.91       |
| 1.48                  | 2.76                    | 2.61                    | 1.61       |
| 1.66                  | 2.62                    | 3.62                    | 2.01       |
| 2.27                  | 3.03                    | 3.62                    | 1.43       |
| 1.83                  | 2.49                    | 3.10                    | 1.80       |
| 1.22                  | 2.99                    | 1.81                    | 1.84       |
| 1.72                  | 5.12                    | 2.85                    | 1.52       |
| 2.07                  | 4.29                    | 3.06                    | 1.39       |
| 1.65                  | 3.73                    | 3.26                    | 3.40       |
| 2.57                  | 3.56                    | 2.76                    | 1.60       |
| 2.18                  | 2.38                    | 2.33                    | 2.32       |
| 1.98                  | 2.74                    | 2.27                    | 1.46       |
| 1.81                  | 3.30                    | 1.79                    | 1.34       |
| 1.91                  | 2.64                    | 2.97                    | 1.95       |
| 2.62                  | 2.25                    | 2.45                    | 2.52       |
| 1.98                  | 2.01                    | 1.77                    | 2.21       |
| 1.73                  | 3.83                    | 2.22                    | 1.59       |
| 1.57                  | 2.54                    | 2.66                    | 2.21       |
| 3.09                  | 3.34                    | 2.21                    | 2.33       |
| 2.41                  | 3.76                    | 2.09                    | 1.34       |
| 1.85                  | 1.90                    | 2.28                    | 1.42       |
| 1.80                  | 2.79                    | 2.91                    | 1.57       |
| 1.86                  | 2.48                    | 1.53                    | 1.35       |
| 2.32                  | 2.43                    | 3.21                    | 1.76       |
| 1.79                  | 3.92                    | 2.30                    | 1.55       |
| 2.45                  | 1.90                    | 1.79                    | 1.49       |
| 2.21                  | 2.87                    | 1.86                    | 3.16       |
| 1.26                  | 2.35                    | 3.03                    | 2.22       |
| 2.10                  | 3.29                    | 4.27                    | 2.40       |
| 2.71                  | 3.02                    | 1.77                    | 1.12       |
| 2.32                  | 3.25                    | 3.22                    | 1.50       |
| 1.92                  | 4.87                    | 3.34                    | 2.39       |
| 2.49                  | 3.24                    | 2.60                    | 0.87       |
| 1.97                  | 3.43                    | 3.26                    | 2.05       |
| 1.77                  | 0.92                    | 2.79                    | 2.17       |
| 2.61                  | 3.83                    | 3.33                    | 1.98       |
| 1.91                  | 4.16                    | 2.21                    | 2.93       |
| 1.88                  | 2.98                    | 2.21                    | 2.70       |
| 2.82                  | 5.06                    | 2.89                    | 2.82       |

\*Slope is the rate of change in performance when progressing from easy to difficult listening conditions. In this case the slope parameter,  $\beta$ , was estimated by fitting a logit function,  $y = \frac{1}{1+e^{-(x-\alpha)/\beta}}$ , where y is the proportion correct, x is the signal strength (dB SNR), and  $\alpha$  is the threshold parameter (dB SNR).
