# Supplementary material
Source: publisher figshare collection journal article supplement (https://asha.figshare.com/articles/dataset/_/5913547)
Supplement: Supplementary file 2 [file 1]

**Supplemental Material S3.** Masker condition signal recognition thresholds (SRTs, dB SNR) in adults (ordering of data is consistent with Supplemental Material S5).

| Steady-state noise | Spectrally modulated | Temporally modulated | Two-talker | Spectral modulation benefit* | Temporal modulation benefit* |
|--------------------|----------------------|----------------------|------------|------------------------------|------------------------------|
| -7.13              | -13.76               | -12.73               | -2.03      | 6.63                         | 5.60                         |
| -7.94              | -15.15               | -13.66               | -6.75      | 7.21                         | 5.71                         |
| -8.29              | -15.33               | -14.20               | -7.19      | 7.04                         | 5.90                         |
| -8.52              | -12.16               | -12.19               | -6.49      | 3.64                         | 3.67                         |
| -8.91              | -15.45               | -13.39               | -9.59      | 6.55                         | 4.49                         |
| -9.17              | -18.61               | -14.52               | -6.77      | 9.44                         | 5.34                         |
| -7.68              | -14.93               | -12.54               | -3.95      | 7.25                         | 4.87                         |
| -8.63              | -7.78                | -12.69               | -5.79      | -0.85                        | 4.06                         |
| -7.44              | -14.03               | -11.46               | -5.29      | 6.59                         | 4.02                         |
| -8.24              | -15.36               | -12.88               | -4.39      | 7.12                         | 4.64                         |
| -8.13              | -13.63               | -13.46               | -7.86      | 5.50                         | 5.33                         |
| -8.68              | -17.55               | -15.13               | -8.32      | 8.88                         | 6.45                         |
| -8.44              | -14.76               | -13.16               | -5.86      | 6.32                         | 4.72                         |
| -8.27              | -15.49               | -13.93               | -7.81      | 7.22                         | 5.65                         |
| -7.64              | -15.96               | -14.64               | -5.57      | 8.32                         | 7.01                         |

\*Benefit is (steady-state noise masker threshold – modulated masker threshold).
