# Supplementary material
Source: publisher figshare collection journal article supplement (https://asha.figshare.com/articles/dataset/_/5913547)
Supplement: Supplementary file 3 [file 1]

**Supplemental Material S2.** Masker condition signal recognition thresholds (SRTs, dB SNR) in children (ordering of data is consistent across Supplemental Materials S1 and S4).

| Steady-state noise | Spectrally modulated | Temporally modulated | Two-talker | Spectral modulation benefit* | Temporal modulation benefit* |
|--------------------|----------------------|----------------------|------------|------------------------------|------------------------------|
| -7.37              | -17.72               | -12.51               | -0.38      | 10.35                        | 5.13                         |
| -8.15              | -15.49               | -12.47               | -0.02      | 7.34                         | 4.32                         |
| -7.13              | -14.81               | -11.49               | -0.09      | 7.68                         | 4.36                         |
| -6.50              | -14.09               | -11.34               | -1.28      | 7.59                         | 4.84                         |
| -7.20              | -13.22               | -11.52               | -1.42      | 6.02                         | 4.32                         |
| -7.83              | -14.33               | -13.97               | -0.56      | 6.50                         | 6.15                         |
| -6.85              | -11.45               | -13.95               | -2.37      | 4.61                         | 7.11                         |
| -7.24              | -16.00               | -11.54               | -0.38      | 8.76                         | 4.31                         |
| -7.61              | -14.25               | -11.94               | -1.50      | 6.65                         | 4.33                         |
| -6.12              | -16.23               | -11.16               | -3.66      | 10.12                        | 5.05                         |
| -6.39              | -13.70               | -10.73               | -0.18      | 7.31                         | 4.35                         |
| -6.90              | -17.01               | -13.19               | -2.69      | 10.11                        | 6.28                         |
| -6.97              | -15.55               | -12.00               | -1.60      | 8.58                         | 5.03                         |
| -6.36              | -13.88               | -11.85               | -1.20      | 7.53                         | 5.50                         |
| -7.04              | -12.54               | -11.99               | -0.26      | 5.50                         | 4.95                         |
| -6.70              | -13.05               | -13.29               | -1.01      | 6.35                         | 6.59                         |
| -7.42              | -13.58               | -12.30               | -1.00      | 6.16                         | 4.88                         |
| -6.83              | -12.63               | -11.26               | -1.38      | 5.81                         | 4.43                         |
| -7.71              | -14.86               | -12.94               | -2.10      | 7.14                         | 5.23                         |
| -6.99              | -15.22               | -12.29               | -1.12      | 8.22                         | 5.30                         |
| -7.10              | -14.78               | -9.96                | -2.19      | 7.68                         | 2.86                         |
| -6.70              | -13.55               | -11.63               | -0.36      | 6.85                         | 4.93                         |
| -7.55              | -16.03               | -14.27               | -3.31      | 8.47                         | 6.72                         |
| -6.32              | -14.07               | -9.79                | 0.07       | 7.75                         | 3.47                         |
| -6.35              | -13.48               | -12.00               | -0.47      | 7.14                         | 5.65                         |
| -6.03              | -12.67               | -12.02               | -1.71      | 6.64                         | 6.00                         |
| -5.27              | -16.28               | -10.28               | -1.32      | 11.00                        | 5.00                         |
| -8.10              | -15.04               | -11.51               | -1.51      | 6.94                         | 3.41                         |
| -6.82              | -14.66               | -14.01               | -1.99      | 7.84                         | 7.19                         |
| -8.14              | -14.61               | -12.99               | 0.00       | 6.48                         | 4.85                         |
| -6.81              | -14.59               | -13.08               | -1.37      | 7.78                         | 6.27                         |
| -7.29              | -12.01               | -13.24               | -0.81      | 4.72                         | 5.95                         |
| -7.72              | -17.24               | -11.41               | -0.74      | 9.53                         | 3.69                         |
| -7.57              | -17.41               | -11.38               | -1.32      | 9.85                         | 3.82                         |
| -6.73              | -13.60               | -9.12                | -0.84      | 6.86                         | 2.39                         |
| -7.53              | -15.82               | -11.51               | 1.10       | 8.30                         | 3.98                         |
| -7.90              | -15.43               | -13.00               | -1.92      | 7.54                         | 5.10                         |
| -7.50              | -14.94               | -13.21               | -2.26      | 7.44                         | 5.71                         |
| -6.56              | -14.31               | -10.28               | -1.53      | 7.75                         | 3.72                         |
| -6.29              | -14.06               | -11.31               | -2.17      | 7.77                         | 5.02                         |
| -8.60              | -14.21               | -13.21               | -2.01      | 5.61                         | 4.61                         |
| -6.98              | -10.28               | -11.53               | -0.38      | 3.30                         | 4.56                         |

\*Benefit is (steady-state noise masker threshold – modulated masker threshold).
