# Supplementary material
Source: publisher figshare collection journal article supplement (https://asha.figshare.com/articles/dataset/_/5913547)
Supplement: Supplementary file 4 [file 1]

### Supplemental Material S10. Amplitude modulation benefit regression results: children.

| Predictor (full model)    | Estimate | SE   | 95% CI        | t statistic | p    | Contribution (%) |
|---------------------------|----------|------|---------------|-------------|------|------------------|
| PDE                       | 0.22     | 0.24 | [−0.25, 0.70] | 0.95        | 0.35 | 14               |
| Elision                   | 0.09     | 0.24 | [−0.40, 0.58] | 0.37        | 0.72 | 7                |
| RAN-L                     | 0.12     | 0.17 | [−0.23, 0.47] | 0.69        | 0.50 | 28               |
| WRMT-3 Composite          | −0.43    | 0.29 | [−1.02, 0.15] | −1.50       | 0.14 | 50               |
|                           |          |      |               |             |      |                  |
| R <sup>2</sup>            | 0.109    |      |               |             |      | 100              |
|                           |          |      |               |             |      |                  |
| Predictor (reduced model) |          |      |               |             |      |                  |
| WRMT-3 Composite          | −0.22    | 0.15 | [−0.53, 0.97] | −1.39       | 0.17 |                  |

*Note.* PDE = Phonological Decoding Efficiency subtest (Test of Word Reading Efficiency–Second Edition [Torgesen, Wagner, & Rashotte, 2012]); RAN-L = Rapid Automatic Naming–Letters subtest (Comprehensive Test of Phonological Processing–Second Edition [CTOPP-2]; Wagner, Torgesen, Rashotte, & Pearson, 2013); Elision = CTOPP-2 subtest; WRMT-3 = Woodcock Reading Mastery Test–Third Edition (Woodcock, 2011); R<sup>2</sup> = the variability explained by the full multivariate model; % contribution = the percentage of the total variability explained by individual predictors (relaimpo package R, using lmg method); SE = standard error; CI = confidence intervals. Degrees of freedom are 41 in all instances.

### References

- Torgesen, J. K., Wagner, R., & Rashotte, C. (2012). *Test of Word Reading Efficiency–Second Edition (TOWRE-2)*. Austin, TX: Pro-Ed.
- Wagner, R. K., Torgesen, J. K., Rashotte, C., & Pearson, N. A. (2013). *Comprehensive Test of Phonological Processing–Second Edition (CTOPP-2)*. Austin, TX: Pro-Ed.
- Woodcock, R. W. (2011). *Woodcock Reading Mastery Tests–Third Edition (WRMT-III)*. Bloomington, MN: Pearson.
