# Supplementary material
Source: publisher figshare collection journal article supplement (https://asha.figshare.com/articles/dataset/_/5913547)
Supplement: Supplementary file 5 [file 1]

**Supplemental Material S1.** Phonological processing/reading measures: children (ordering of data is consistent across Supplemental Materials S2 and S4).

| RAN-L | Elision | PDE | TOWRE-2<br>Composite | WRMT-3<br>Basic Skills | PPVT-4 | H-PAT |
|-------|---------|-----|----------------------|------------------------|--------|-------|
| 110   | 105     | 103 | 103                  | 110                    | 99     | 12    |
| 90    | 95      | 92  | 92                   | 104                    | 111    | 12    |
| 85    | 105     | 115 | 116                  | 129                    | 147    | 12    |
| 105   | 105     | 106 | 108                  | 105                    | 120    | 12    |
| 100   | 85      | 81  | 94                   | 93                     | 103    | 8     |
| 110   | 95      | 104 | 105                  | 105                    | 105    | 7     |
| 90    | 100     | 97  | 100                  | 97                     | 126    | 12    |
| 85    | 120     | 116 | 114                  | 112                    | 109    | 12    |
| 95    | 115     | 101 | 103                  | 126                    | 124    | 12    |
| 110   | 130     | 111 | 106                  | 123                    | 119    | 12    |
| 100   | 85      | 90  | 95                   | 96                     | 110    | 12    |
| 110   | 120     | 118 | 112                  | 121                    | 118    | 12    |
| 110   | 110     | 112 | 113                  | 109                    | 106    | 11    |
| 95    | 105     | 97  | 98                   | 110                    | 124    | 12    |
| 115   | 85      | 94  | 92                   | 91                     | 110    | 12    |
| 115   | 120     | 120 | 124                  | 122                    | 135    | 12    |
| 110   | 95      | 115 | 119                  | 105                    | 99     | 10    |
| 85    | 95      | 84  | 87                   | 100                    | 113    | 12    |
| 95    | 95      | 82  | 94                   | 91                     | 120    | 12    |
| 95    | 85      | 98  | 100                  | 109                    | 109    | 12    |
| 95    | 80      | 89  | 93                   | 97                     | 113    | 12    |
| 95    | 125     | 116 | 113                  | 117                    | 142    | 12    |
| 105   | 100     | 114 | 116                  | 113                    | 115    | 11    |
| 115   | 90      | 106 | 105                  | 97                     | 107    | 12    |
| 110   | 105     | 99  | 114                  | 106                    | 113    | 12    |
| 110   | 125     | 121 | 123                  | 114                    | 149    | 12    |
| 95    | 100     | 92  | 97                   | 98                     | 100    | 12    |
| 95    | 115     | 108 | 108                  | 112                    | 113    | 12    |
| 80    | 90      | 82  | 87                   | 94                     | 110    | 11    |
| 85    | 110     | 102 | 104                  | 113                    | 118    | 12    |
| 115   | 100     | 97  | 94                   | 91                     | 115    | 11    |
| 95    | 85      | 86  | 94                   | 101                    | 130    | 12    |
| 95    | 130     | 101 | 101                  | 129                    | 109    | 12    |
| 90    | 100     | 115 | 117                  | 112                    | 105    | 12    |
| 95    | 120     | 111 | 111                  | 131                    | 130    | 12    |
| 95    | 120     | 105 | 100                  | 106                    | 131    | 12    |
| 105   | 100     | 117 | 119                  | 112                    | 100    | 10    |
| 115   | 110     | 119 | 119                  | 116                    | 110    | 10    |
| 110   | 130     | 105 | 107                  | 121                    | 133    | 12    |
| 115   | 85      | 80  | 90                   | 92                     | 114    | 10    |
| 105   | 125     | 103 | 104                  | 113                    | 120    | 12    |
| 90    | 85      | 116 | 114                  | 111                    | 121    | 11    |

*Note.* RAN-L = Rapid Automatic Naming–Letters subtest (Comprehensive Test of Phonological Processing–Second Edition [CTOPP-2]; Wagner, Torgesen, Rashotte, & Pearson, 2013); Elision = CTOPP-2 subtest; PDE = Phonemic Decoding Efficiency subtest (TOWRE-2); TOWRE-2 = Test of Word Reading Efficiency–Second Edition (Torgesen, Wagner, & Rashotte, 2012); WRMT-3 = Woodcock Reading Mastery Test–Third Edition (Woodcock, 2011); PPVT-4 = Peabody Picture Vocabulary Test–Fourth Edition (Dunn & Dunn, 2007); H-PAT = HearBuilder Phonological Awareness Test (Wiig & Second, 2011).

## References

- Dunn, L. M., & Dunn, D. M. (2007). *Peabody Picture Vocabulary Test—Fourth Edition (PPVT-4)*. Minneapolis, MN: Pearson.
- Torgesen, J. K., Wagner, R., & Rashotte, C. (2012). *Test of Word Reading Efficiency—Second Edition (TOWRE-2)*. Austin, TX: Pro-Ed.
- Wagner, R. K., Torgesen, J. K., Rashotte, C., & Pearson, N. A. (2013). *Comprehensive Test of Phonological Processing—Second Edition (CTOPP-2)*. Austin, TX: Pro-Ed.
- Wiig, E., & Secord, W. (2011). *HearBuilder Phonological Awareness Test (H-PAT)*. Greenville, SC: Super Duper Publications.
- Woodcock, R. W. (2011). *Woodcock Reading Mastery Tests—Third Edition (WRMT-III)*. Bloomington, MN: Pearson.
