# Supplementary material
Source: publisher figshare collection journal article supplement (https://asha.figshare.com/articles/dataset/_/5913547)
Supplement: Supplementary file 6 [file 1]

## Supplemental Material S9. Spectral modulation benefit regression results: children.

| Predictor (full model)    | Estimate | SE   | 95% CI         | t statistic | p     | Contribution (%) |
|---------------------------|----------|------|----------------|-------------|-------|------------------|
| PDE                       | −0.10    | 0.24 | [−0.58, 0.38]  | −0.43       | 0.67  | 8                |
| Elision                   | 0.31     | 0.24 | [−0.18, 0.80]  | 1.28        | 0.21  | 63               |
| RAN-L                     | 0.11     | 0.17 | [−0.24, 0.46]  | 0.62        | 0.54  | 11               |
| WRMT-3 Composite          | 0.046    | 0.29 | [−0.54, 0.63]  | 0.16        | 0.88  | 19               |
|                           |          |      |                |             |       |                  |
| R <sup>2</sup>            | 0.099    |      |                |             |       | 100              |
|                           |          |      |                |             |       |                  |
| Predictor (reduced model) |          |      |                |             |       |                  |
| Elision                   | 0.30     | 0.15 | [−0.009, 0.60] | 1.96        | 0.057 |                  |

*Note.* PDE = Phonological Decoding Efficiency subtest (Test of Word Reading Efficiency–Second Edition [Torgesen, Wagner, & Rashotte, 2012]); RAN-L = Rapid Automatic Naming–Letters subtest (Comprehensive Test of Phonological Processing–Second Edition [CTOPP-2]; Wagner, Torgesen, Rashotte, & Pearson, 2013); Elision = CTOPP-2 subtest; WRMT-3 = Woodcock Reading Mastery Test–Third Edition (Woodcock, 2011); R<sup>2</sup> = the variability explained by the full multivariate model; % contribution = the percentage of the total variability explained by individual predictors (relaimpo package R, using lmg method); SE = standard error; CI = confidence intervals. Degrees of freedom are 41 in all instances.

## References

- Torgesen, J. K., Wagner, R., & Rashotte, C. (2012). *Test of Word Reading Efficiency–Second Edition (TOWRE-2)*. Austin, TX: Pro-Ed.
- Wagner, R. K., Torgesen, J. K., Rashotte, C., & Pearson, N. A. (2013). *Comprehensive Test of Phonological Processing–Second Edition (CTOPP-2)*. Austin, TX: Pro-Ed.
- Woodcock, R. W. (2011). *Woodcock Reading Mastery Tests–Third Edition (WRMT-III)*. Bloomington, MN: Pearson.
