# Supplementary material
Source: publisher figshare collection journal article supplement (https://asha.figshare.com/articles/dataset/_/5913547)
Supplement: Supplementary file 7 [file 1]

### Supplemental Material S11. Steady-state noise slope regression results: children.

| Predictor (full model)           | Estimate | SE   | 95% CI         | <i>t</i> | <i>p</i> | Contribution (%) |
|----------------------------------|----------|------|----------------|----------|----------|------------------|
| PDE                              | 0.10     | 0.10 | [−0.23, 0.70]  | 1.03     | 0.31     | 7                |
| Elision                          | 0.14     | 0.10 | [−0.15, 0.79]  | 1.36     | 0.18     | 18               |
| RAN-L                            | −0.17    | 0.07 | [−0.74, −0.06] | −2.41    | 0.02     | 67               |
| WRMT-3 Composite                 | −0.15    | 0.12 | [−0.93, 0.21]  | −1.28    | 0.21     | 8                |
|                                  |          |      |                |          |          |                  |
| <b>R<sup>2</sup></b>             | 0.158    |      |                |          |          | 100              |
|                                  |          |      |                |          |          |                  |
| <b>Predictor (reduced model)</b> |          |      |                |          |          |                  |
| RAN-L                            | −0.12    | 0.06 | [−0.60, 0.01]  | −1.95    | 0.059    |                  |

*Note.* PDE = Phonological Decoding Efficiency subtest (Test of Word Reading Efficiency–Second Edition [Torgesen, Wagner, & Rashotte, 2012]); RAN-L = Rapid Automatic Naming–Letters subtest (Comprehensive Test of Phonological Processing–Second Edition [CTOPP-2]; Wagner, Torgesen, Rashotte, & Pearson, 2013); Elision = CTOPP-2 subtest; WRMT-3 = Woodcock Reading Mastery Test–Third Edition (Woodcock, 2011);  $R^2$  = the variability explained by the full multivariate model; % contribution = the percentage of the total variability explained by individual predictors (relaimpo package R, using lmg method); *SE* = standard error; *CI* = confidence intervals. Degrees of freedom are 41 in all instances.

### References

- Torgesen, J. K., Wagner, R., & Rashotte, C. (2012). *Test of Word Reading Efficiency–Second Edition (TOWRE-2)*. Austin, TX: Pro-Ed.
- Wagner, R. K., Torgesen, J. K., Rashotte, C., & Pearson, N. A. (2013). *Comprehensive Test of Phonological Processing–Second Edition (CTOPP-2)*. Austin, TX: Pro-Ed.
- Woodcock, R. W. (2011). *Woodcock Reading Mastery Tests–Third Edition (WRMT-III)*. Bloomington, MN: Pearson.
