# Supplementary material
Source: publisher figshare collection journal article supplement (https://asha.figshare.com/articles/dataset/_/5913547)
Supplement: Supplementary file 8 [file 1]

**Supplemental Material S6.** Least-squares (LS) means estimates of masker condition signal recognition thresholds (SRTs) in adults and children.

| Masking condition   | Age group | LS mean | SE   | df | Lower 95% CL | Upper 95% CL |
|---------------------|-----------|---------|------|----|--------------|--------------|
| Two-talker          | Adult     | −6.24   | 0.33 | 56 | −6.91        | −5.58        |
| Steady-state noise  | Adult     | −8.21   | 0.17 | 56 | −8.55        | −7.87        |
| Temporal modulation | Adult     | −13.37  | 0.28 | 56 | −13.94       | −12.81       |
| Spectral modulation | Adult     | −14.66  | 0.47 | 56 | −15.61       | −13.71       |
| Two-talker          | Child     | −1.22   | 0.20 | 55 | −1.62        | −0.82        |
| Steady-state noise  | Child     | −7.07   | 0.10 | 55 | −7.28        | −6.87        |
| Temporal modulation | Child     | −12.01  | 0.17 | 55 | −12.35       | −11.67       |
| Spectral modulation | Child     | −14.49  | 0.28 | 55 | −15.06       | −13.92       |

*Note.* SE = standard error; df = degrees of freedom; CL = confidence level.
