# Supplementary material
Source: publisher figshare collection journal article supplement (https://asha.figshare.com/articles/dataset/_/5913547)
Supplement: Supplementary file 9 [file 1]

**Supplemental Material S8.** Two-talker masker speech recognition threshold (SRT) regression results: children.

| Predictor (full model)    | Estimate | SE   | 95% CI        | t statistic | p    | Contribution (%) |
|---------------------------|----------|------|---------------|-------------|------|------------------|
| PDE                       | 0.19     | 0.24 | [−0.30, 0.32] | 0.77        | 0.45 | 10               |
| Elision                   | 0.09     | 0.25 | [−0.59, 0.41] | −0.38       | 0.71 | 11               |
| RAN-L                     | −0.26    | 0.18 | [−0.61, 0.10] | −1.47       | 0.15 | 74               |
| WRMT-3 Composite          | −0.11    | 0.30 | [−0.71, 0.49] | −0.37       | 0.72 | 4                |
|                           |          |      |               |             |      |                  |
| R <sup>2</sup>            | 0.067    |      |               |             |      | 100              |
|                           |          |      |               |             |      |                  |
| Predictor (reduced model) |          |      |               |             |      |                  |
| RAN-L                     | −0.22    | 0.15 | [−0.53, 0.09] | −1.41       | 0.17 |                  |

*Note.* PDE = Phonological Decoding Efficiency subtest (Test of Word Reading Efficiency–Second Edition [Torgesen, Wagner, & Rashotte, 2012]); RAN-L = Rapid Automatic Naming–Letters subtest (Comprehensive Test of Phonological Processing–Second Edition [CTOPP-2]; Wagner, Torgesen, Rashotte, & Pearson, 2013); Elision = CTOPP-2 subtest; WRMT-3 = Woodcock Reading Mastery Test–Third Edition (Woodcock, 2011); R<sup>2</sup> = the variability explained by the full multivariate model; % contribution = the percentage of the total variability explained by individual predictors (relaimpo package R, using lmg method); SE = standard error; CI = confidence intervals. Degrees of freedom are 41 in all instances.

## References

- Torgesen, J. K., Wagner, R., & Rashotte, C. (2012). *Test of Word Reading Efficiency–Second Edition (TOWRE-2)*. Austin, TX: Pro-Ed.
- Wagner, R. K., Torgesen, J. K., Rashotte, C., & Pearson, N. A. (2013). *Comprehensive Test of Phonological Processing–Second Edition (CTOPP-2)*. Austin, TX: Pro-Ed.
- Woodcock, R. W. (2011). *Woodcock Reading Mastery Tests–Third Edition (WRMT-III)*. Bloomington, MN: Pearson.
