# Supplementary material
Source: publisher figshare collection journal article supplement (https://asha.figshare.com/articles/dataset/_/5913547)
Supplement: Supplementary file 10 [file 1]

**Supplemental Material S5.** Masker condition signal recognition slopes\* in adults (ordering of data is consistent with Supplemental Material S3).

| Steady-state<br>noise | Temporally<br>modulated | Spectrally<br>modulated | Two-talker |
|-----------------------|-------------------------|-------------------------|------------|
| 1.5                   | 1.27                    | 2.59                    | 2.29       |
| 1.48                  | 2.36                    | 2.53                    | 4.85       |
| 1.42                  | 2.62                    | 2.1                     | 4.87       |
| 2.46                  | 2.07                    | 2.08                    | 3.62       |
| 1.98                  | 3.25                    | 1.92                    | 4.34       |
| 1.05                  | 1.79                    | 2.42                    | 5.84       |
| 1.83                  | 2.06                    | 2.32                    | 2.26       |
| 1.74                  | 7.12                    | 2.78                    | 3.16       |
| 0.87                  | 2.20                    | 1.64                    | 3.35       |
| 1.67                  | 2.40                    | 2.74                    | 1.38       |
| 2.11                  | 2.92                    | 2.02                    | 3.30       |
| 1.69                  | 3.52                    | 3.4                     | 5.22       |
| 2.76                  | 2.63                    | 2.39                    | 5.50       |
| 2.09                  | 0.95                    | 1.96                    | 4.28       |
| 1.80                  | 2.35                    | 2.66                    | 4.16       |

\*Slope is the rate of change in performance when progressing from easy to difficult listening conditions. In this case the slope parameter,  $\beta$ , was estimated by fitting a logit function,  $y = \frac{1}{1+e^{-(x-\alpha)/\beta}}$ , where y is the proportion correct, x is the signal strength (dB SNR), and  $\alpha$  is the threshold parameter (dB SNR).
