# Supplementary material
Source: publisher figshare collection journal article supplement (https://asha.figshare.com/articles/dataset/_/5913547)
Supplement: Supplementary file 11 [file 1]

**Supplemental Material S7.** Least-squares (LS) means estimates of masker condition signal recognition slopes in adults and children.

| Masking condition   | Age group | LS mean | <i>SE</i> | <i>df</i> | Lower 95% CL | Upper 95% CL |
|---------------------|-----------|---------|-----------|-----------|--------------|--------------|
| Two-talker          | Adult     | 3.89    | 0.22      | 56        | 3.46         | 4.33         |
| Steady-state noise  | Adult     | 1.76    | 0.12      | 56        | 1.53         | 1.99         |
| Temporal modulation | Adult     | 2.63    | 0.27      | 56        | 2.10         | 3.17         |
| Spectral modulation | Adult     | 2.37    | 0.15      | 56        | 2.06         | 2.67         |
| Two-talker          | Child     | 1.95    | 0.13      | 55        | 1.69         | 2.21         |
| Steady-state noise  | Child     | 2.00    | 0.07      | 55        | 1.87         | 2.14         |
| Temporal modulation | Child     | 3.05    | 0.16      | 55        | 2.73         | 3.37         |
| Spectral modulation | Child     | 2.58    | 0.09      | 55        | 2.40         | 2.77         |

*Note.* *SE* = standard error; *df* = degrees of freedom; CL = confidence level.
